# Supplementary material for: Sequencing and Chromosome-Scale Assembly of Plant Genomes, Brassica rapa as a Use Case
Source: MDPI journal article supplement (doi:10.3390/biology10080732), 2021-07-30

**Table S1. Metrics of Nanopore datasets**

| <b>Readset</b>            | <b>All reads</b> | <b>Longest reads</b> | <b>Filtlong reads</b> |
|---------------------------|------------------|----------------------|-----------------------|
| Cumulative size           | 93,615,101,387   | 15,000,004,992       | 15,000,009,495        |
| Coverage                  | 186x             | 30x                  | 30x                   |
| Number of reads           | 13,094,187       | 214,687              | 316,605               |
| N50                       | 26,978           | 68,127               | 50,558                |
| Number of<br>reads > 50kb | 296,164          | 214,687              | 117,159               |
| coverage > 50kb           | 38x              | 30x                  | 15x                   |

**Table S2. Metrics of raw Smartdenovo Nanopore assemblies. Statistics were generated on contigs of more than 30kb in size.**

| Readset             | All reads       | Longest reads  | Filtlong reads |
|---------------------|-----------------|----------------|----------------|
| Cumulative size     | 413,393,283     | 354,455,409    | 320,273,956    |
| Number of contigs   | 596             | 323            | 429            |
| N50 (L50)           | 10,591,557 (14) | 4,616,132 (19) | 2,264,044 (35) |
| N90 (L90)           | 246,123 (185)   | 326,576 (146)  | 263,776 (203)  |
| auN                 | 9,674,642       | 6,312,816      | 3,679,656      |
| Max. size           | 27,174,673      | 18,229,467     | 17,762,612     |
| Complete buscos (%) | 1,576 (97.6%)   | 1,436 (88.9%)  | 1,557 (96.5%)  |
| Mercury score       | 25.1333         | 20.3158        | 23.8738        |

**Table S3. Metrics of raw Flye Nanopore assemblies. Statistics were generated on contigs of more than 30kb in size.**

| Readset             | All reads      | Longest reads   | Filtlong reads |
|---------------------|----------------|-----------------|----------------|
| Cumulative size     | 308,405,611    | 340,681,490     | 320,203,564    |
| Number of contigs   | 195            | 266             | 382            |
| N50 (L50)           | 8,877,964 (12) | 13,456,414 (10) | 6,180,078 (13) |
| N90 (L90)           | 974,980 (48)   | 497,751 (58)    | 310,436 (106)  |
| auN                 | 9,118,954      | 12,335,383      | 8,103,042      |
| Max. size           | 21,466,788     | 27,098,069      | 22,540,294     |
| Complete buscos (%) | 1,585 (98.2%)  | 1,584 (98.1%)   | 1,594 (98.8%)  |
| Mercury score       | 28.7338        | 27.4808         | 28.0033        |

**Table S4. Metrics of raw Wtdbg2 Nanopore assemblies. Statistics were generated on contigs of more than 30kb in size.**

| Readset             | All reads      | Longest reads  | Filtlong reads |
|---------------------|----------------|----------------|----------------|
| Cumulative size     | 728,902,491    | 541,375,314    | 381,524,645    |
| Number of contigs   | 9,550          | 5,095          | 3,213          |
| N50 (L50)           | 87,609 (2,265) | 142,868 (574)  | 206,244 (357)  |
| N90 (L90)           | 38,374 (7,405) | 42,678 (3,598) | 44,750 (2,179) |
| auN                 | 144,875        | 654,911        | 450,988        |
| Max. size           | 1,853,134      | 6,900,900      | 3,496,279      |
| Complete buscos (%) | 1,455 (90.1%)  | 1,365 (84.6%)  | 1,402 (86.9%)  |
| Mercury score       | 17.4181        | 15.9445        | 18.4839        |

**Table S5. Metrics of the raw Necat Nanopore assembly. Statistics were generated on contigs of more than 30kb in size.**

| Readset             | All reads       |
|---------------------|-----------------|
| Cumulative size     | 442,919,932     |
| Number of contigs   | 299             |
| N50 (L50)           | 10,445,217 (12) |
| N90 (L90)           | 856,761 (58)    |
| auN                 | 14,175,039      |
| Max. size           | 45,040,585      |
| Complete buscos (%) | 1,567 (97.1%)   |
| Mercury score       | 27.513          |

**Table S6. Metrics of the Necat assembly after each polishing step. Statistics were generated on contigs of more than 30kb in size.**

|                     | Raw             | Racon           | Medaka          | Hapo-G x2       |
|---------------------|-----------------|-----------------|-----------------|-----------------|
| Cumulative size     | 442,919,932     | 443,505,353     | 443,619,512     | 443,649,441     |
| Number of contigs   | 299             | 299             | 299             | 299             |
| N50 (L50)           | 10,445,217 (12) | 10,458,156 (12) | 10,461,728 (12) | 10,461,875 (12) |
| N90 (L90)           | 856,761 (58)    | 857,014 (58)    | 850,928 (58)    | 857,267 (58)    |
| auN                 | 14,175,039      | 14,197,548      | 14,204,585      | 14,202,687      |
| Max. size           | 45,040,585      | 45,103,281      | 45,117,601      | 45,115,632      |
| Complete buscos (%) | 1,567 (97.1%)   | 1,592 (98.6%)   | 1,602 (99.3%)   | 1,604 (99.4%)   |
| Merqury score       | 27.513          | 29.8573         | 31.0464         | 36.4423         |

**Table S7. Hybrid scaffolding results.**

|                 | Nanopore<br>contigs | Hybrid<br>scaffolds | Contigs<br>left | Assembly<br>after<br>Hybrid<br>scaffolding | Scaffolds<br>after<br>BisCoT<br>treatment | Contigs<br>after<br>BisCoT<br>treatment | Scaffolds<br>after<br>polishing<br>with<br>Hapo-G |
|-----------------|---------------------|---------------------|-----------------|--------------------------------------------|-------------------------------------------|-----------------------------------------|---------------------------------------------------|
| Number          | 299                 | 53                  | 208             | 261                                        | 236                                       | 296                                     | 236                                               |
| N50 (L50)       | 10,461,875<br>(12)  | 16,816,852<br>(8)   | 154,636<br>(53) | 16,816,852<br>(8)                          | 17,017,530<br>(8)                         | 10,256,302<br>(14)                      | 17,017,634<br>(8)                                 |
| N90 (L90)       | 857,267<br>(58)     | 4,034,000<br>(45)   | 67,775<br>(152) | 1,954,922<br>(32)                          | 3,409,196<br>(30)                         | 981,751<br>(59)                         | 3,409,175<br>(30)                                 |
| Min size        | 30,349              | 118,769             | 30,349          | 30,349                                     | 30,347                                    | 30,347                                  | 30,348                                            |
| Max size        | 45,115,632          | 44,052,815          | 978,115         | 44,052,815                                 | 44,068,965                                | 27,443,240                              | 44,069,534                                        |
| Cumulative size | 443,649,441         | 420,416,306         | 26,002,488      | 446,418,794                                | 443,948,706                               | 441,033,740                             | 443,951,349                                       |
| %N              | 0%                  | 0.7%                | 0%              | 0.66%                                      | 0.66%                                     | 0%                                      | 0.66%                                             |

**Table S8. Metrics of the Pore-C raw PromethION run with (left column) or without (right column) reads of more than 100kb in size.**

| <b>Readset</b>             | <b>All reads</b> | <b>Reads &lt; 100kb</b> |
|----------------------------|------------------|-------------------------|
| Cumulative size            | 15,551,590,510   | 15,502,009,110          |
| Number of reads            | 5,894,741        | 5,894,524               |
| N50                        | 3,990            | 3,990                   |
| Number of<br>reads > 100kb | 217              | 0                       |
| Cumulative size > 100kb    | 49,581,400       | 0                       |

**Figure S1. Dotplots of polished Necat contigs aligned to *Brassica rapa* Chiifu (left) or *Brassica napus* Darmor-BZH A genome (right).**

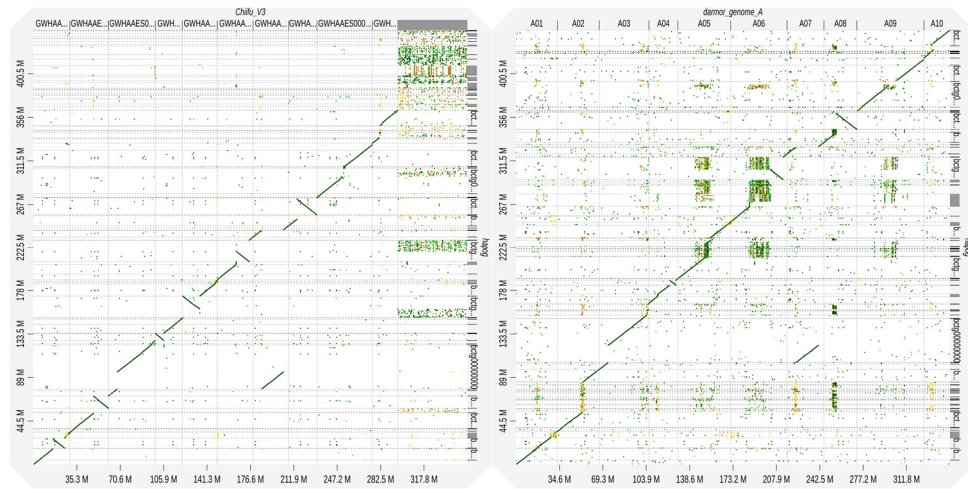

**Figure S2. Dotplots of Bionano scaffolds aligned to *Brassica rapa* Chiifu (left) or *Brassica napus* Darmor-BZH A genome (right).**

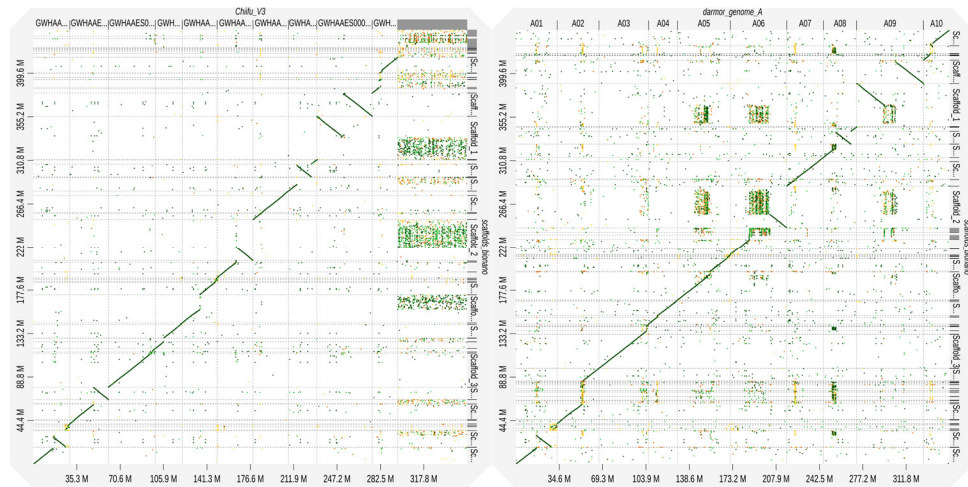

**Figure S3. Dotplots of Omni-C scaffolds aligned to *Brassica rapa* Chiifu (left) or *Brassica napus* Darmor-BZH A genome (right).**

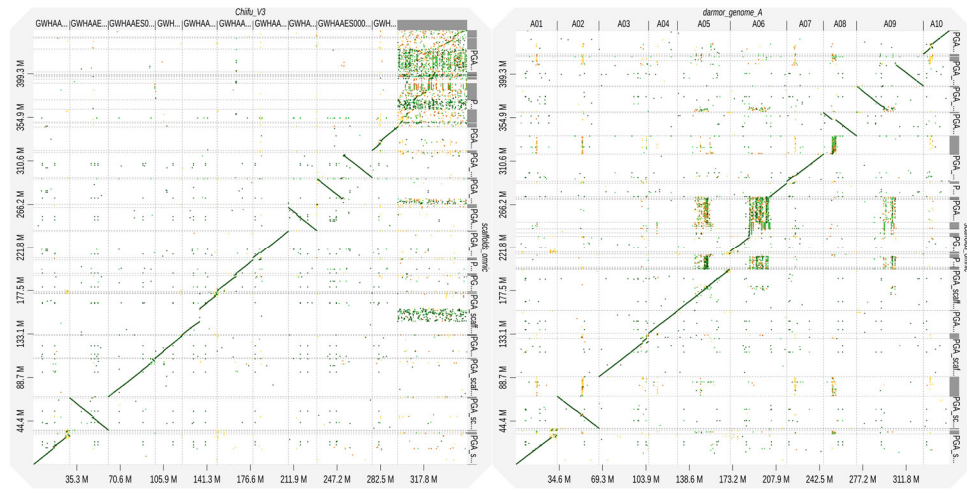

**Figure S4. Dotplots of Pore-C scaffolds aligned to *Brassica rapa* Chiifu (left) or *Brassica napus* Darmor-BZH A genome (right).**

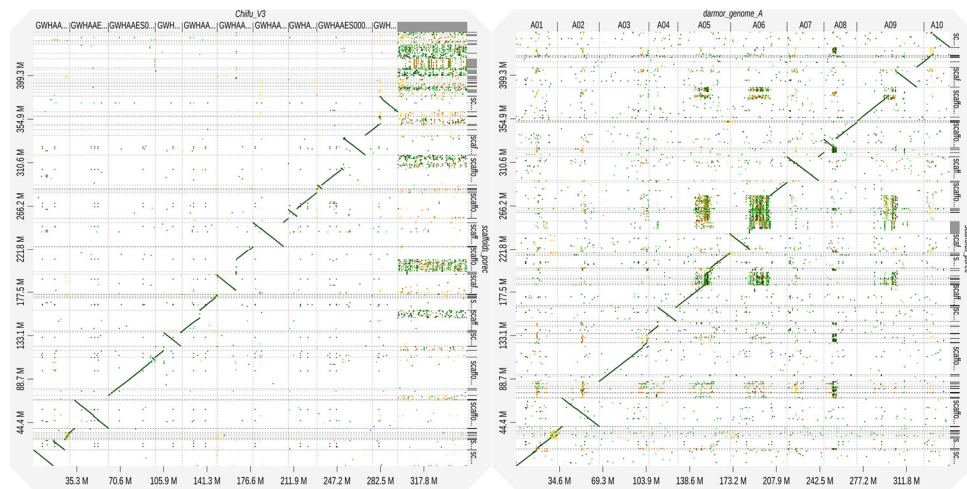



**Figure S5. Dotplots of Bionano + Omni-C scaffolds aligned to *Brassica rapa* Chiifu (left) or *Brassica napus* Darmor-BZH A genome (right).**

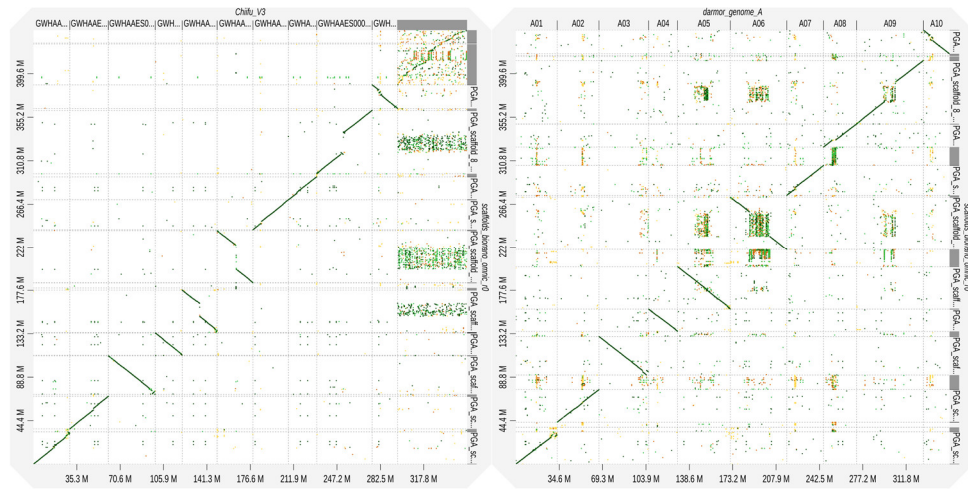

**Figure S6. Dotplots of Bionano + Pore-C scaffolds aligned to *Brassica rapa* Chiifu (left) or *Brassica napus* Darmor-BZH A genome (right).**

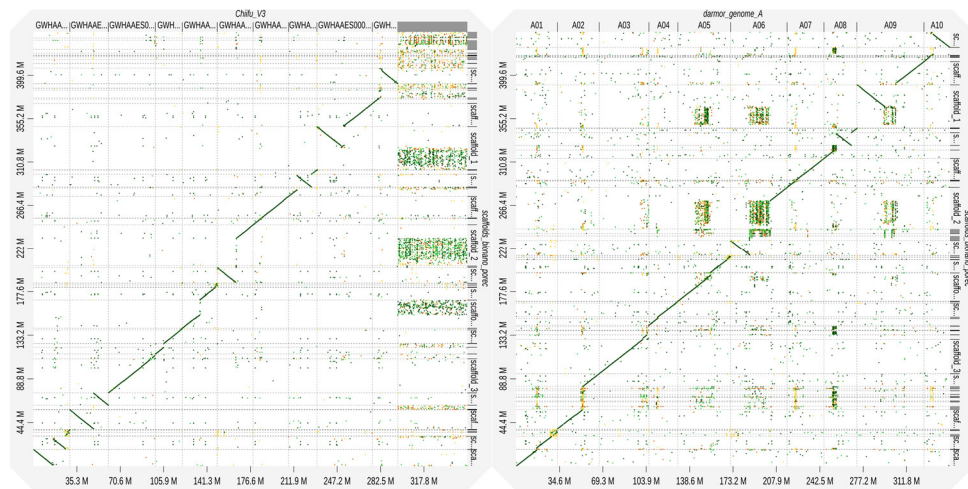

**Figure S7. Dotplots of Omni-C + Bionano scaffolds aligned to *Brassica rapa* Chiifu (left) or *Brassica napus* Darmor-BZH A genome (right).**

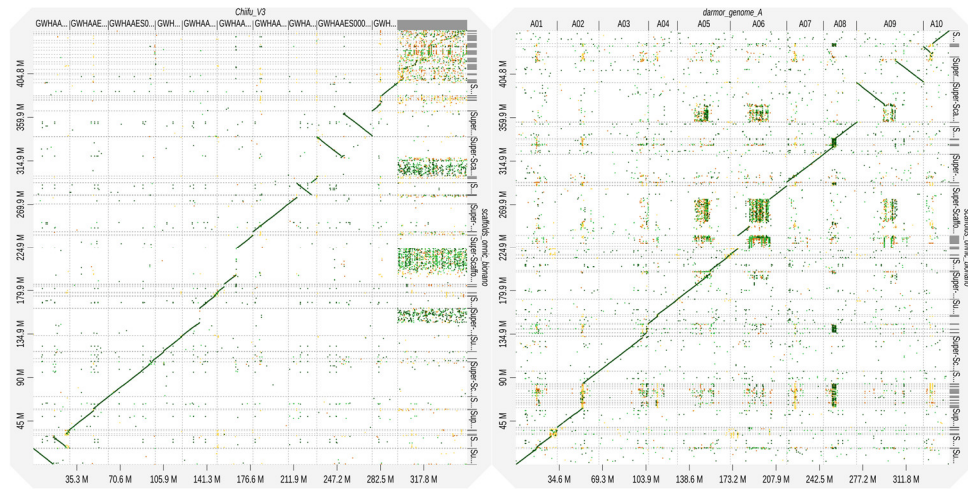

**Figure S8. Dotplots of Pore-C + Bionano scaffolds aligned to *Brassica rapa* Chiifu (left) or *Brassica napus* Darmor-BZH A genome (right).**

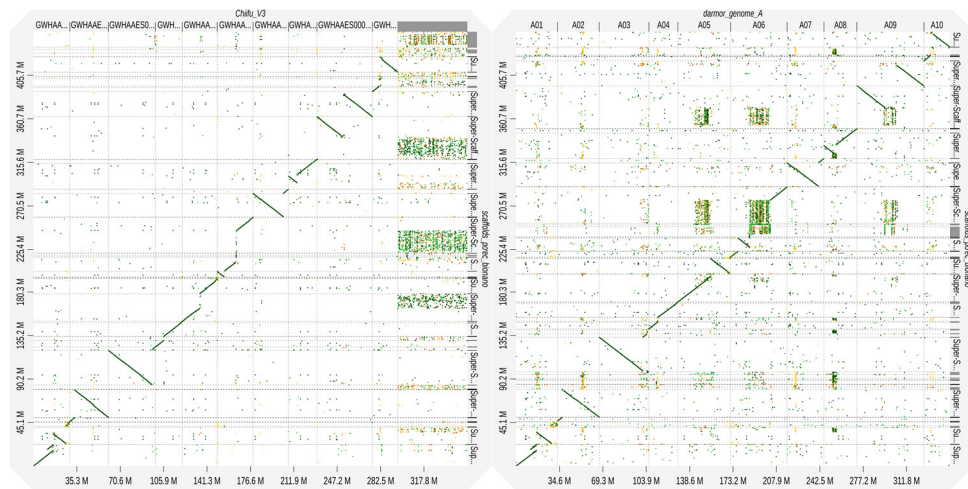



**Figure S9. Contact Map generated with the Omni-C library (mapping on the nanopore contigs).**  
The left panel shows the contact before review. The right panel shows the contact map after review.

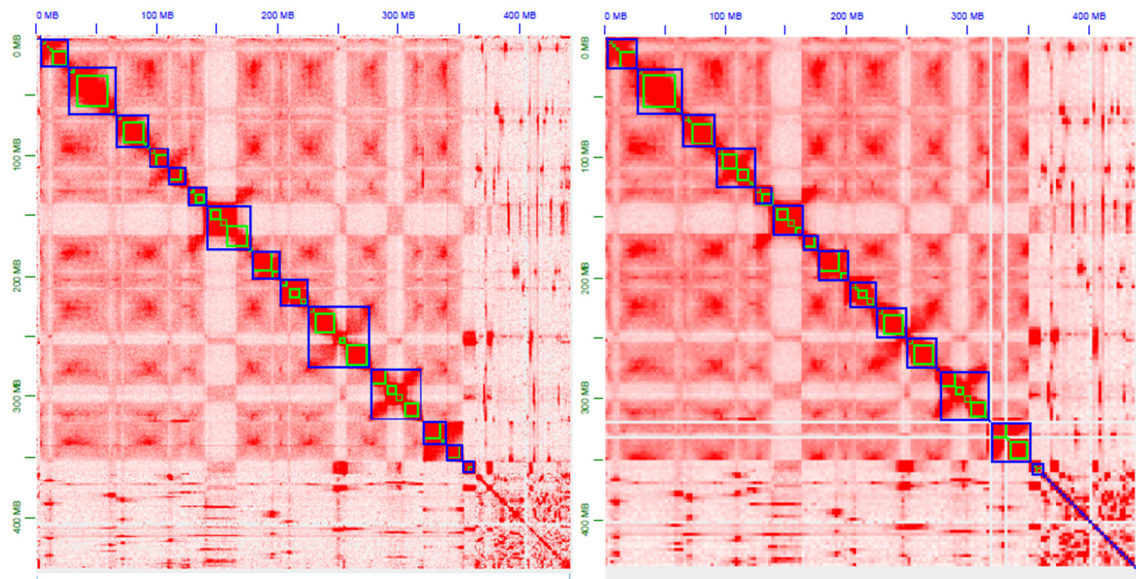

**Figure S10. Contact Map generated with the Omni-C library (mapping on the bionano scaffolds).**  
The left panel shows the contact before review. The right panel shows the contact map after review.

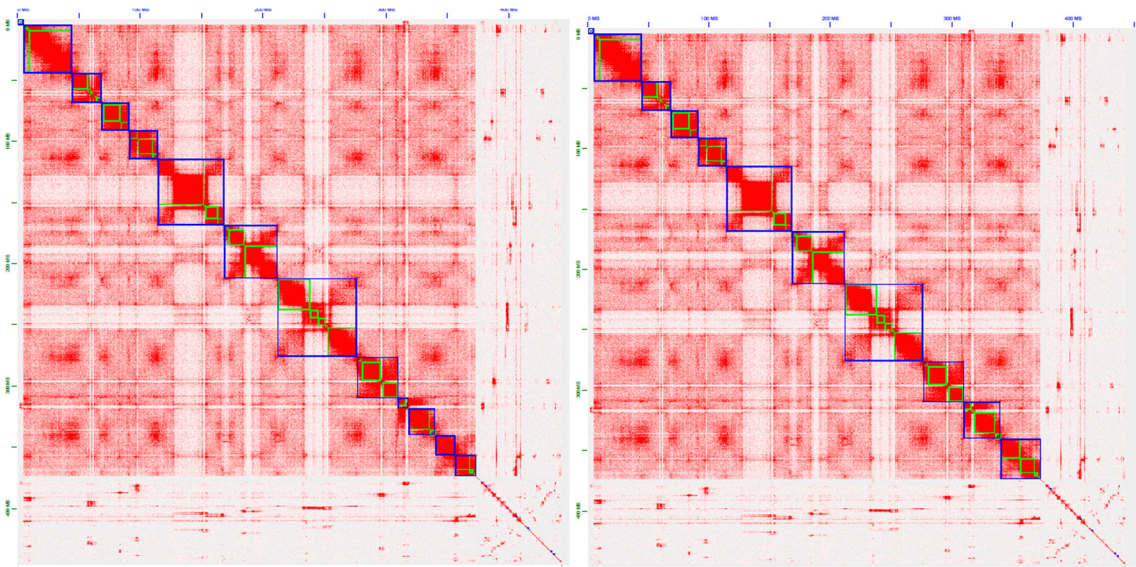

**Figure S11.** Conflict example detected by the optical maps on the Omni-C scaffolds. The two first lines represent the DLE-1 maps. The third line represents one Omni-C scaffold. The two last lines represent the BspQI maps. The vertical lines show the correspondence between the labels of the scaffold and the labels of the maps. In the middle, we can see a region without any correspondence which leads to a break of the scaffold.

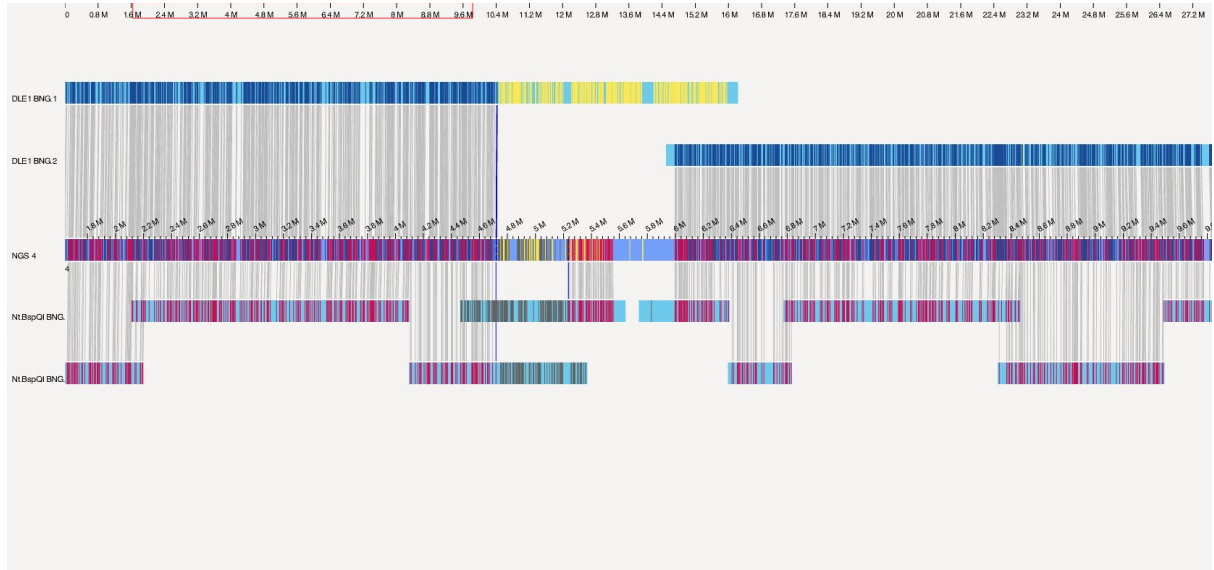

**Figure S12.** Conflict example detected by the optical maps on the Pore-C scaffolds. The three first lines represent the DLE-1 maps. The fourth line represents one Pore-C scaffold. The two last lines represent the BspQI maps. The vertical lines show the correspondence between the labels of the scaffold and the labels of the maps. We can see regions without any correspondence (the yellow portion of the DLE-1 maps and the grey portions of the BspQI maps) which leads to several breaks of the scaffold.

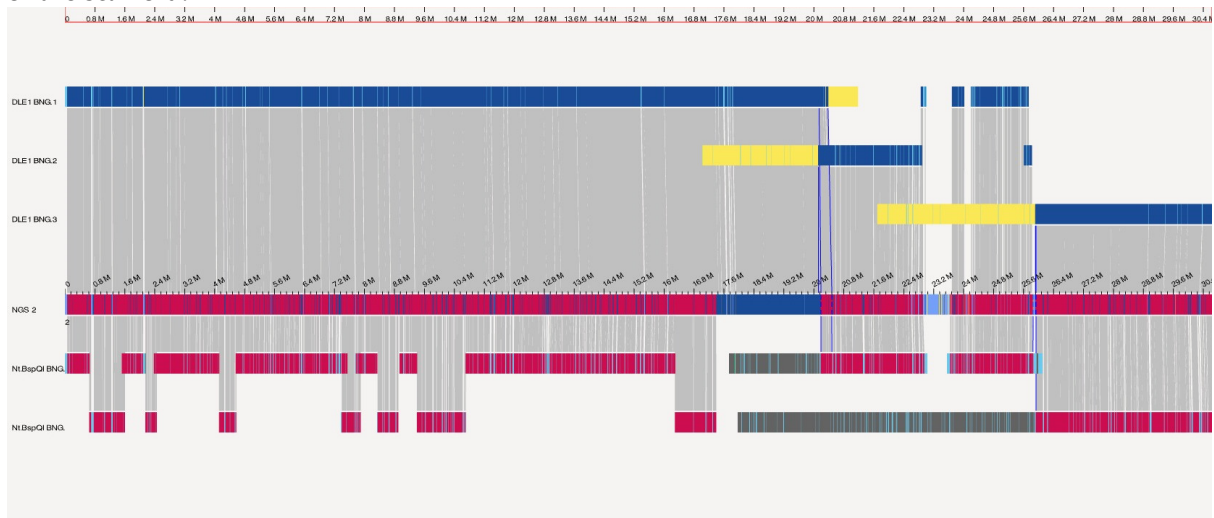

Supplement: s1 [file s1]
